# Supplementary figures and images for: Extending Thrombolysis in Acute Ischemic Stroke to Primary Care: Early Experiences with a Network-Based Teleneurology Approach
Source: MDPI journal article supplement (doi:10.3390/neurolint14010012), 2022-01-21

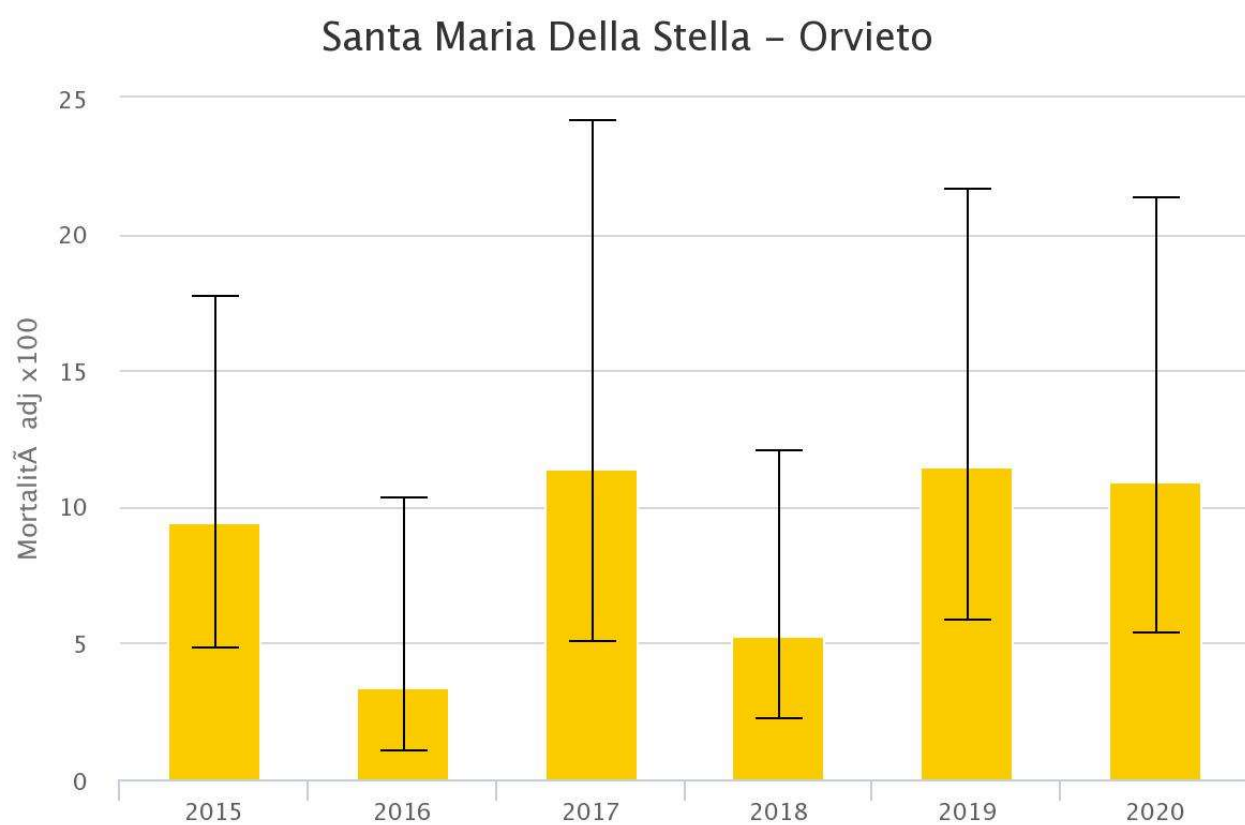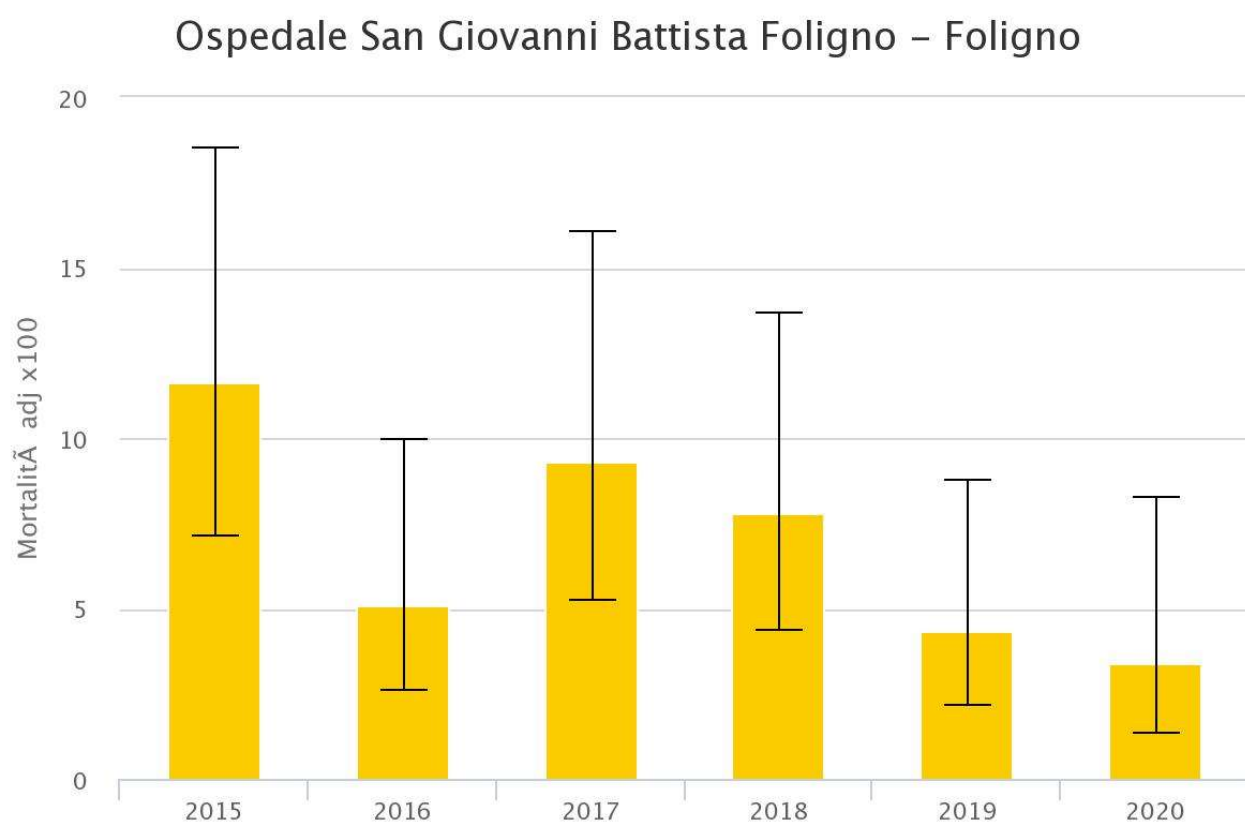

**Figure S1.** Two charts on 30-day mortality trends in each of the participating hospital.

Supplement: s1 [file s1]
